# Supplementary material for: Rosmarinic Acid Improves Cognitive Abilities and Glucose Metabolism in Aged C57Bl/6N Mice While Disrupting Lipid Profile in Young Adults in a Sex-Dependent Fashion
Source: MDPI journal article supplement (doi:10.3390/nu15153366), 2023-07-28
Supplement: s1 [file s1]

## 1320

**Maintenance diet for rats and mice**

The 1320 formula is a cereal-based (soy, wheat, corn) fixed formula which is free of alfalfa and fish/animal meal and deficient in nitrosamines. This maintenance diet was designed as complete feedingstuff for rats/mice from an age of 8 weeks.

**Available as**

1321 - Powder                      1324 - 10mm pellets                      1328 - Hybridpellet                      1329 - Extrudate

**Product variations**

The 1320 formula is optionally also available in one or a combination of the following variants.

**Variant P**

deficient in phytoestrogens

**Variant Fortified**

autoclavable, increased vitamin content, coated on request

**Variant Irradiated**

irradiated with 5 to 50kGy

**Variant TPF**

total pathogen free

*The contents may vary for these variants.*

**Metabolized energy**

| Content        |       | Value | unit    |
|----------------|-------|-------|---------|
| Fat            | 367   | (11%) | kcal/kg |
| Protein        | 768   | (24%) | kcal/kg |
| Carbonhydrates | 2,091 | (65%) | kcal/kg |

**crude nutrients and moisture**

| Content                  |         | Value   | unit  |
|--------------------------|---------|---------|-------|
| Moisture                 | 113,426 | (11.3%) | mg/kg |
| Crude Ash                | 58,553  | (5.9%)  | mg/kg |
| Crude Fibre              | 60,744  | (6.1%)  | mg/kg |
| Crude Fat                | 40,791  | (4.1%)  | mg/kg |
| Crude Protein            | 192,111 | (19.2%) | mg/kg |
| Nitrogenfree extractives | 534,374 | (53.4%) | mg/kg |

## Carbonhydrates

| Content         | Value   | unit  |
|-----------------|---------|-------|
| Monosaccharides | 0       | mg/kg |
| Disaccharides   | 47,779  | mg/kg |
| Polysaccharides | 391,216 | mg/kg |

## Minerals

| Content    | Value | unit  |
|------------|-------|-------|
| Calcium    | 7,012 | mg/kg |
| Potassium  | 8,797 | mg/kg |
| Magnesium  | 2,220 | mg/kg |
| Sodium     | 2,128 | mg/kg |
| Phosphorus | 5,014 | mg/kg |

## Trace elements

| Content    | Value    | unit  |
|------------|----------|-------|
| Aluminium  | 79.37    | mg/kg |
| Chlorine   | 3,484.07 | mg/kg |
| Iron       | 192.51   | mg/kg |
| Flourine   | 2.80     | mg/kg |
| Iodine     | 1.66     | mg/kg |
| Cobalt     | 0.34     | mg/kg |
| Copper     | 12.81    | mg/kg |
| Manganese  | 95.06    | mg/kg |
| Molybdenum | 1.10     | mg/kg |
| Sulfur     | 1,141.22 | mg/kg |
| Selenium   | 0.25     | mg/kg |
| Zinc       | 95.18    | mg/kg |

## Added vitamins

| Content          | Standard | Fortified | unit  |
|------------------|----------|-----------|-------|
| Vitamin A        | 15,000   | 26,250    | IU/kg |
| Vitamin D3       | 600      | 1,050     | IU/kg |
| Vitamin E        | 75       | 132       | mg/kg |
| Vitamin K3       | 3        | 5         | mg/kg |
| Vitamin B1       | 18       | 32        | mg/kg |
| Vitamin B2       | 12       | 21        | mg/kg |
| Vitamin B6       | 9        | 16        | mg/kg |
| Vitamin B12      | 24       | 42        | µg/kg |
| Nicotinic acid   | 36       | 63        | mg/kg |
| Pantothenic acid | 21       | 37        | mg/kg |
| Folic acid       | 2        | 4         | mg/kg |
| Biotin           | 167      | 205       | µg/kg |
| Choline chloride | 600      | 1,050     | mg/kg |
| Vitamin C        | 36       | 63        | mg/kg |

## Amino acids

| Content       | Value  | unit  |
|---------------|--------|-------|
| Alanine       | 8,292  | mg/kg |
| Arginine      | 11,175 | mg/kg |
| Aspartic acid | 15,297 | mg/kg |
| Cystine       | 3,182  | mg/kg |
| Glutamic acid | 38,695 | mg/kg |
| Glycine       | 8,028  | mg/kg |
| Histidine     | 4,351  | mg/kg |
| Isoleucine    | 7,408  | mg/kg |
| Leucine       | 13,214 | mg/kg |
| Lysine        | 8,101  | mg/kg |
| Methionine    | 2,709  | mg/kg |
| Phenylalanine | 8,221  | mg/kg |
| Proline       | 12,523 | mg/kg |
| Serine        | 8,965  | mg/kg |
| Threonine     | 6,399  | mg/kg |
| Tryptophan    | 2,342  | mg/kg |
| Tyrosine      | 5,849  | mg/kg |
| Valine        | 8,634  | mg/kg |

## Fatty acid

| Content                     | Value  | unit  |
|-----------------------------|--------|-------|
| Arachidic acid C-20:0       | 35     | mg/kg |
| Eicosanoic acid C-20:1      | 44     | mg/kg |
| Alpha-Linolenic acid C-18:3 | 2,210  | mg/kg |
| Linolenic acid C-18:2       | 16,152 | mg/kg |
| Palmitic acid C-16:0        | 3,878  | mg/kg |
| Stearic acid C-18:0         | 1,187  | mg/kg |
| Oleic acid C-18:1           | 6,823  | mg/kg |
