# Supplementary material for: Rosmarinic Acid Improves Cognitive Abilities and Glucose Metabolism in Aged C57Bl/6N Mice While Disrupting Lipid Profile in Young Adults in a Sex-Dependent Fashion
Source: MDPI journal article supplement (doi:10.3390/nu15153366), 2023-07-28
Supplement: s1 [file s1]

# Supplementary Materials

## 1. Pilot study to determine RA solubility in water and solution palatability

Rosmarinic acid (RA) was extracted from edible plants (*Rosmarinus officinalis*) and provided as powdered dry extract by AnalytiCon Discovery (Hermannswerder Haus, Potsdam, Germany).

The dose of RA was 500 mg/Kg, selected by a previous study conducted from M. Ristow laboratory (Ristow et al., unpublished). In order to be able to administer RA through drinking water, a non-invasive route of administration, a preliminary study was necessary to evaluate average daily water intake for each mouse so to determine RA concentration. To this aim, water intake was monitored by weighing water bottles every Monday for 4 weeks. To obtain individual daily consumption, difference in weight was averaged among days and number of subjects/cage. Results showed an average daily consumption of 5.27 ml and 5.15 ml respectively for male and female mice. Thus, considering an average body weight of 30 g/mouse and an average daily consumption of about 5 ml, the calculation of concentration was as follows:

500 mg/Kg → 500 mg/1000 g mouse → 0.5 mg/g mouse → 15 mg/mouse/day  
15 mg/5 ml → 3 mg/ml → 750 mg in 250 ml (small mouse bottle)

RA powder showed good solubility in water and the solution obtained showed a good stability (no deposits or alterations of odor and color were detected).

Since the RA solution had a pH of 2.86 possibly affecting its palatability, a pilot study was carried out in order to select the pH buffer in which dissolve the RA powdered dry extract and the palatability of the buffered RA solution by mice. To this aim, a phosphate buffer solution ( $\text{H}_2\text{KPO}_4/\text{K}_2\text{HPO}_4$ ) was selected since it was well tolerated, palatable and routinely used in the food industry. More in detail, 13.6 g of  $\text{KH}_2\text{PO}_4$  were dissolved in 1 l of drinking water to obtain a 100 mM buffer (pH 5.8). Successively a 100 mM  $\text{H}_3\text{PO}_4$  solution was added to obtain three different buffers at the following pH: 3, 4 or 5. The buffer solutions and the control (tap water) were administered to mice in the drinking bottles and the spontaneous consumption was monitored over 5 days by weighting the bottles every 24 hours. The consumption was comparable for the three solutions however, a slight preference was observed for the pH 4 buffer (pH 3, 5.19 ml/mouse, n=9; pH 4, 5.28 ml/mouse, n=8; pH 5, 5.17 ml/mouse, n=8; control, 4.58 ml/mouse, n=4) that was eventually selected as vehicle.

In order to test the palatability of the RA solution dissolved in the selected buffer, 1.5 g of RA was dissolved in 400 ml of  $\text{KH}_2\text{PO}_4$  solution. Then, a  $\text{K}_2\text{HPO}_4$  solution was added to adjust to pH 4 and  $\text{KH}_2\text{PO}_4$  solution was added making up the volume of 500 ml. The solution was administered to 14 male mice (2/3 for cage) and the average daily individual consumption was monitored over 3 days and compared to the consumption of vehicle (phosphate buffer pH 4). Results indicated no significant differences between vehicle and RA solution consumption.

## 2. Evaluation of RA toxicity

To determine if RA 500 mg/Kg dose induced liver toxicity at old age, we measured plasma Alanine Aminotransferase (ALAT) levels, since an increase of this enzyme is considered as a key marker of hepatocellular injury. Blood samples from the tail vein (day 0) and from the trunk blood (at sacrifice, day 52) from a total of 16 mice (RA: 3 males, 5 females; Control: 3 males, 5 females) was collected in heparinized vials before and after 52 days of RA treatment (500 mg/Kg) and stored at -80°C until the biochemical analyses.

### 2.1. Biochemical analysis to determine plasmatic ALAT concentration

Determination of alanine-aminotransferase (ALAT) in plasma was performed using an automated analyser (Cobas Mira S, Hoffmann-La Roche, Basel, Switzerland) with commercially available reagent kit (ALAT (GPT) FS (IFCC mod.), diatools, Villmergen, Switzerland).

## 2.2. Results

No significant difference was observed due to RA treatment (repeated measures x treatment interaction, males:  $F(1,4)=0.001$ ;  $p=0.9811$ ; females:  $F(1,8)=0.044$ ;  $p=0.8393$ , Fig. 1S), thus we can state that there was no toxicity.

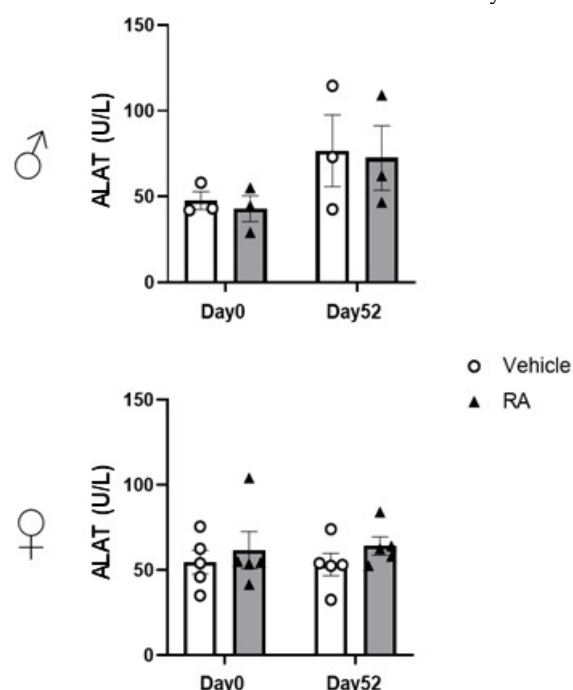

**Figure S1.** Alanine transaminase concentration. No significant difference was observed between RA and control mice at old age. Data are expressed as mean  $\pm$  SEM. White dots and black triangles represents individual observations for Veh and RA mice, respectively.  $N=3-5$ /group.

## 3. Sample size determination

The sample size needed for each experiment was established as  $n=10$  by performing a statistical power analysis to allow the assessment of a standardized difference between any pair of means of at least 0.65 SD for any response variable (with a medium to large effect sizes) based on the distribution of the primary response variable, the number of experimental groups for each pair of comparisons (age; sex), the experimental design (dependent or independent statistical units), with a level of significance  $\alpha=0.05$  in a two-tailed test and a power  $(1 - \beta)=0.80$ . For this experiment, since we aimed at characterize the ability of RA to counteract cognitive decline of old subjects, the Morris Water Maze test was selected as primary response variable based on the available literature on senescent mice.

## 4. Minimization of potential confounders

Subjects were allocated into the experimental groups based on a minimization approach avoiding body weight bias. After the assignment to each experimental group, cages were allocated into the animal facility avoiding bias due to the cage position within the room. All tests were conducted during the dark phase (09:00 am – 02:00 pm) that is the period of maximum activity of nocturnal rodents. The order of animal testing as well as the starting position of each mouse for the Elevated Plus Maze test were counterbalanced considering sex and treatment.

## 5. Exclusion criteria and summary statistics

### *Elevated Plus Maze*

Exclusion criteria: animals falling from the maze after 60 sec following the beginning of testing were excluded from the statistical analysis. The final number of mice in the 24-month-old group was RA: males=5, females=7; Control: males=5, females=7; the final number of mice in the 3-month-old group was RA: males=12, females=13; Control: males=8, females=10.

| TIME IN ARMS (%) |        |        |       |  |               |        |        |       |
|------------------|--------|--------|-------|--|---------------|--------|--------|-------|
| Old males        | Mean   | SD     | SE    |  | Young males   | Mean   | SD     | SE    |
| Veh, open %      | 36.131 | 11.598 | 5.187 |  | Veh, open %   | 26.084 | 8.804  | 3.113 |
| Veh, close %     | 63.869 | 11.598 | 5.187 |  | Veh, close %  | 73.916 | 8.804  | 3.113 |
| RA, open %       | 37.912 | 6.210  | 2.777 |  | RA, open %    | 31.915 | 9.888  | 2.854 |
| RA, close %      | 62.088 | 6.210  | 2.777 |  | RA, close %   | 68.085 | 9.888  | 2.854 |
|                  |        |        |       |  |               |        |        |       |
| Old females      | Mean   | SD     | SE    |  | Young females | Mean   | SD     | SE    |
| Veh, open %      | 37.051 | 11.017 | 4.164 |  | Veh, open %   | 27.504 | 12.984 | 4.106 |
| Veh, close %     | 62.949 | 11.017 | 4.164 |  | Veh, close %  | 72.496 | 12.984 | 4.106 |
| RA, open %       | 47.250 | 17.036 | 6.439 |  | RA, open %    | 24.069 | 10.357 | 2.872 |
| RA, close %      | 52.750 | 17.036 | 6.439 |  | RA, close %   | 75.931 | 10.357 | 2.872 |

| CLOSED ARMS ENTRIES (N. OF EVENTS) |        |       |       |  |               |        |       |       |
|------------------------------------|--------|-------|-------|--|---------------|--------|-------|-------|
| Old males                          | Mean   | SD    | SE    |  | Young males   | Mean   | SD    | SE    |
| Veh                                | 8.200  | 2.683 | 1.200 |  | Veh           | 13.250 | 2.816 | 0.996 |
| RA                                 | 9.600  | 1.140 | 0.510 |  | RA            | 12.917 | 4.522 | 1.305 |
|                                    |        |       |       |  |               |        |       |       |
| Old females                        | Mean   | SD    | SE    |  | Young females | Mean   | SD    | SE    |
| Veh                                | 10.286 | 1.113 | 0.421 |  | Veh           | 16.900 | 2.685 | 0.849 |
| RA                                 | 7.143  | 3.185 | 1.204 |  | RA            | 16.769 | 3.370 | 0.935 |

### *Morris Water Maze*

Exclusion criteria: visual impairment as assessed in the cued phase (habituation) or overt physical impairment while swimming. The final number of mice in the 24-month-old group was RA: males=7, females=7; Control: males=5, females=8; the final number of mice in the 3-month-old group was RA: males=12, females=13; Control: males=9, females=10.

| HABITUATION - Latency (s) |        |        |       |  |               |        |        |       |
|---------------------------|--------|--------|-------|--|---------------|--------|--------|-------|
| Old males                 | Mean   | SD     | SE    |  | Young males   | Mean   | SD     | SE    |
| Veh, day1-t1              | 25.376 | 20.107 | 8.992 |  | Veh, day1-t1  | 30.342 | 18.964 | 6.321 |
| Veh, day1-t2              | 18.064 | 14.803 | 6.620 |  | Veh, day1-t2  | 10.369 | 7.581  | 2.527 |
| Veh, day1-t3              | 11.704 | 8.800  | 3.936 |  | Veh, day1-t3  | 12.716 | 18.117 | 6.039 |
| RA, day1-t1               | 38.314 | 22.276 | 8.420 |  | RA, day1-t1   | 28.767 | 13.452 | 3.883 |
| RA, day1-t2               | 21.229 | 21.877 | 8.269 |  | RA, day1-t2   | 13.773 | 18.406 | 5.313 |
| RA, day1-t3               | 7.200  | 4.087  | 1.545 |  | RA, day1-t3   | 4.963  | 2.407  | 0.695 |
|                           |        |        |       |  |               |        |        |       |
| Old females               | Mean   | SD     | SE    |  | Young females | Mean   | SD     | SE    |
| Veh, day1-t1              | 34.840 | 22.677 | 8.018 |  | Veh, day1-t1  | 27.724 | 11.284 | 3.568 |
| Veh, day1-t2              | 18.920 | 18.423 | 6.513 |  | Veh, day1-t2  | 10.396 | 10.629 | 3.361 |
| Veh, day1-t3              | 14.255 | 7.443  | 2.631 |  | Veh, day1-t3  | 7.556  | 4.471  | 1.414 |
| RA, day1-t1               | 31.423 | 20.054 | 7.580 |  | RA, day1-t1   | 27.880 | 16.088 | 4.462 |
| RA, day1-t2               | 19.966 | 19.597 | 7.407 |  | RA, day1-t2   | 15.348 | 16.278 | 4.515 |
| RA, day1-t3               | 15.674 | 11.504 | 4.348 |  | RA, day1-t3   | 5.643  | 4.792  | 1.329 |

| ACQUISITION - Latency (s) |        |        |        |  |               |        |        |       |
|---------------------------|--------|--------|--------|--|---------------|--------|--------|-------|
| Old males                 | Mean   | SD     | SE     |  | Young males   | Mean   | SD     | SE    |
| Veh, day1-t1              | 35.440 | 18.589 | 8.313  |  | Veh, day1-t1  | 4.604  | 2.217  | 0.739 |
| Veh, day1-t2              | 10.680 | 5.549  | 2.482  |  | Veh, day1-t2  | 6.858  | 6.907  | 2.302 |
| Veh, day1-t3              | 16.248 | 23.489 | 10.505 |  | Veh, day1-t3  | 5.547  | 6.596  | 2.199 |
| RA, day1-t1               | 9.623  | 4.622  | 1.747  |  | RA, day1-t1   | 8.500  | 11.774 | 3.399 |
| RA, day1-t2               | 15.697 | 20.363 | 7.697  |  | RA, day1-t2   | 11.953 | 10.076 | 2.909 |
| RA, day1-t3               | 2.777  | 1.956  | 0.739  |  | RA, day1-t3   | 6.483  | 4.737  | 1.367 |
|                           |        |        |        |  |               |        |        |       |
| Old females               | Mean   | SD     | SE     |  | Young females | Mean   | SD     | SE    |
| Veh, day1-t1              | 14.845 | 11.862 | 4.194  |  | Veh, day1-t1  | 7.852  | 6.225  | 1.978 |
| Veh, day1-t2              | 8.645  | 3.616  | 1.279  |  | Veh, day1-t2  | 5.172  | 3.959  | 1.252 |
| Veh, day1-t3              | 12.245 | 14.779 | 5.225  |  | Veh, day1-t3  | 8.224  | 7.161  | 2.264 |
| RA, day1-t1               | 15.091 | 12.620 | 4.770  |  | RA, day1-t1   | 5.480  | 3.872  | 1.074 |
| RA, day1-t2               | 21.846 | 21.377 | 8.080  |  | RA, day1-t2   | 7.274  | 4.003  | 1.110 |
| RA, day1-t3               | 16.766 | 12.796 | 4.837  |  | RA, day1-t3   | 12.218 | 10.784 | 2.991 |

| PROBE - Time in quadrants (%) |        |        |       |  |               |        |        |       |
|-------------------------------|--------|--------|-------|--|---------------|--------|--------|-------|
| Old males                     | Mean   | SD     | SE    |  | Young males   | Mean   | SD     | SE    |
| Veh, target %                 | 28.120 | 3.431  | 1.534 |  | Veh, target % | 49.991 | 11.290 | 3.763 |
| Veh, others %                 | 23.917 | 1.154  | 0.516 |  | Veh, others % | 16.590 | 3.711  | 1.237 |
| RA, target %                  | 26.098 | 10.285 | 3.887 |  | RA, target %  | 49.217 | 15.497 | 4.474 |
| RA, others %                  | 24.600 | 3.456  | 1.306 |  | RA, others %  | 16.845 | 5.194  | 1.499 |
|                               |        |        |       |  |               |        |        |       |
| Old females                   | Mean   | SD     | SE    |  | Young females | Mean   | SD     | SE    |
| Veh, target %                 | 25.858 | 7.627  | 2.697 |  | Veh, target % | 48.300 | 13.062 | 4.131 |
| Veh, others %                 | 24.710 | 2.552  | 0.902 |  | Veh, others % | 17.206 | 4.382  | 1.386 |
| RA, target %                  | 35.414 | 8.945  | 3.381 |  | RA, target %  | 47.787 | 11.048 | 3.064 |
| RA, others %                  | 21.506 | 2.967  | 1.122 |  | RA, others %  | 17.389 | 3.680  | 1.021 |

### *Hippocampal BDNF levels*

Exclusion criteria: whether following the extraction procedure the amount of tissue available was not sufficient to assay BDNF levels, subjects were excluded from the statistical analysis. The final number of mice in the 24-month-old group was RA: males=7, females=7; Control: males=5, females=8; the final number of mice in the 3-month-old group was RA: males=12, females=13; Control: males=9, females=10.

| BDNF (pg/mg) |        |        |       |  |               |       |       |       |
|--------------|--------|--------|-------|--|---------------|-------|-------|-------|
| Old males    | Mean   | SD     | SE    |  | Young males   | Mean  | SD    | SE    |
| Veh          | 9.445  | 7.455  | 3.334 |  | Veh           | 6.011 | 1.709 | 0.570 |
| RA           | 10.793 | 6.478  | 2.448 |  | RA            | 7.217 | 3.210 | 0.927 |
|              |        |        |       |  |               |       |       |       |
| Old females  | Mean   | SD     | SE    |  | Young females | Mean  | SD    | SE    |
| Veh          | 10.550 | 8.210  | 2.903 |  | Veh           | 9.560 | 1.666 | 0.527 |
| RA           | 15.338 | 12.488 | 4.720 |  | RA            | 6.572 | 1.756 | 0.487 |

### *Body weight*

Exclusion criteria for the analysis of this parameter were not set. The final number of mice in the 24-month-old group was RA: males=7, females=7; Control: males=5, females=8; the final number of mice in the 3-month-old group was RA: males=12, females=13; Control: males=9, females=10.

| BODY WEIGHT (g) |        |       |       |               |             |        |       |       |
|-----------------|--------|-------|-------|---------------|-------------|--------|-------|-------|
| Old males       | Mean   | SD    | SE    |               | Young males | Mean   | SD    | SE    |
| Veh, day 0      | 31.200 | 0.255 | 0.114 |               | Veh, day 0  | 23.700 | 2.458 | 0.819 |
| Veh, day 28     | 32.200 | 1.007 | 0.451 |               | Veh, day 28 | 27.078 | 3.073 | 1.024 |
| Veh, day 50     | 30.700 | 0.212 | 0.095 |               | Veh, day 50 | 28.356 | 3.259 | 1.086 |
| RA, day 0       | 32.243 | 2.501 | 0.945 |               | RA, day 0   | 23.350 | 1.523 | 0.440 |
| RA, day 28      | 32.614 | 2.756 | 1.042 |               | RA, day 28  | 25.617 | 2.071 | 0.598 |
| RA, day 50      | 30.100 | 1.945 | 0.735 |               | RA, day 50  | 27.325 | 3.024 | 0.873 |
|                 |        |       |       |               |             |        |       |       |
| Old females     | Mean   | SD    | SE    | Young females | Mean        | SD     | SE    |       |
| Veh, day 0      | 26.350 | 1.307 | 0.462 | Veh, day 0    | 20.820      | 0.939  | 0.297 |       |
| Veh, day 28     | 26.213 | 1.348 | 0.477 | Veh, day 28   | 20.210      | 2.124  | 0.672 |       |
| Veh, day 50     | 25.700 | 1.645 | 0.582 | Veh, day 50   | 23.330      | 0.702  | 0.222 |       |
| RA, day 0       | 26.014 | 1.979 | 0.748 | RA, day 0     | 20.877      | 0.828  | 0.230 |       |
| RA, day 28      | 26.643 | 1.764 | 0.667 | RA, day 28    | 22.046      | 0.859  | 0.238 |       |
| RA, day 50      | 25.100 | 1.443 | 0.546 | RA, day 50    | 23.000      | 0.920  | 0.255 |       |

### *Glucose Tolerance Test*

Exclusion criteria for the analysis of this parameter were not set. The final number of mice in the 24-month-old group was RA: males=7, females=7; Control: males=5, females=8; the final number of mice in the 3-month-old group was RA: males=11, females=13; Control: males=10, females=10.

| GLUCOSE TOLERANCE TEST - Glycaemia (mg/dL) |         |        |        |  |               |         |        |        |
|--------------------------------------------|---------|--------|--------|--|---------------|---------|--------|--------|
| Old males                                  | Mean    | SD     | SE     |  | Young males   | Mean    | SD     | SE     |
| Veh, GTT-t0                                | 131.800 | 11.432 | 5.113  |  | Veh, GTT-t0   | 104.700 | 16.125 | 5.099  |
| Veh, GTT-t30                               | 187.200 | 59.655 | 26.678 |  | Veh, GTT-t30  | 232.700 | 60.579 | 19.157 |
| Veh, GTT-t60                               | 152.800 | 14.789 | 6.614  |  | Veh, GTT-t60  | 138.600 | 23.529 | 7.440  |
| Veh, GTT-t120                              | 128.200 | 15.881 | 7.102  |  | Veh, GTT-t120 | 103.500 | 21.844 | 6.908  |
| Veh, GTT-t180                              | 109.600 | 15.931 | 7.125  |  | Veh, GTT-t180 | 92.500  | 14.073 | 4.450  |
| RA, GTT-t0                                 | 112.000 | 15.155 | 5.728  |  | RA, GTT-t0    | 113.545 | 20.002 | 6.031  |
| RA, GTT-t30                                | 178.571 | 41.653 | 15.743 |  | RA, GTT-t30   | 235.636 | 42.359 | 12.772 |
| RA, GTT-t60                                | 160.000 | 39.179 | 14.808 |  | RA, GTT-t60   | 184.727 | 34.955 | 10.539 |
| RA, GTT-t120                               | 129.000 | 23.875 | 9.024  |  | RA, GTT-t120  | 117.545 | 13.538 | 4.082  |
| RA, GTT-t180                               | 107.429 | 15.576 | 5.887  |  | RA, GTT-t180  | 112.545 | 13.634 | 4.111  |
|                                            |         |        |        |  |               |         |        |        |
| Old females                                | Mean    | SD     | SE     |  | Young females | Mean    | SD     | SE     |
| Veh, GTT-t0                                | 105.500 | 31.473 | 11.128 |  | Veh, GTT-t0   | 92.600  | 11.890 | 3.760  |
| Veh, GTT-t30                               | 188.500 | 45.482 | 16.080 |  | Veh, GTT-t30  | 233.800 | 28.397 | 8.980  |
| Veh, GTT-t60                               | 151.500 | 36.465 | 12.892 |  | Veh, GTT-t60  | 162.100 | 7.400  | 2.340  |
| Veh, GTT-t120                              | 128.625 | 20.570 | 7.273  |  | Veh, GTT-t120 | 105.200 | 10.239 | 3.238  |
| Veh, GTT-t180                              | 114.625 | 17.386 | 6.147  |  | Veh, GTT-t180 | 107.000 | 9.626  | 3.044  |
| RA, GTT-t0                                 | 121.714 | 7.296  | 2.758  |  | RA, GTT-t0    | 107.538 | 13.709 | 3.802  |
| RA, GTT-t30                                | 163.429 | 26.602 | 10.054 |  | RA, GTT-t30   | 229.769 | 47.687 | 13.226 |
| RA, GTT-t60                                | 128.857 | 18.407 | 6.957  |  | RA, GTT-t60   | 171.154 | 24.231 | 6.720  |
| RA, GTT-t120                               | 115.143 | 13.801 | 5.216  |  | RA, GTT-t120  | 115.385 | 12.718 | 3.527  |
| RA, GTT-t180                               | 102.286 | 15.283 | 5.776  |  | RA, GTT-t180  | 100.615 | 9.224  | 2.558  |

#### *Insulin sensitivity test*

Exclusion criteria: animals showing blood glucose levels  $\leq 40$  mg/dl after insulin challenge were excluded from the test and received an i.p. glucose injection to restore glucose homeostasis. The final number of mice in the 24-month-old group was RA: males=7, females=7; Control: males=5, females=6; the final number of mice in the 3-month-old group was RA: males=12, females=12; Control: males=9, females=9.

| INSULIN SENSITIVITY TEST - Glycaemia (mg/dL) |         |        |        |               |               |         |        |       |
|----------------------------------------------|---------|--------|--------|---------------|---------------|---------|--------|-------|
| Old males                                    |         |        |        |               | Young males   |         |        |       |
| Mean                                         | SD      | SE     | Mean   |               | SD            | SE      |        |       |
| Veh, IST-t0                                  | 115.800 | 12.775 | 5.713  |               | Veh, IST-t0   | 95.778  | 8.333  | 2.778 |
| Veh, IST-t15                                 | 92.200  | 17.740 | 7.933  |               | Veh, IST-t15  | 72.556  | 9.901  | 3.300 |
| Veh, IST-t30                                 | 84.800  | 21.476 | 9.604  |               | Veh, IST-t30  | 51.778  | 11.745 | 3.915 |
| Veh, IST-t60                                 | 66.400  | 29.720 | 13.291 |               | Veh, IST-t60  | 66.778  | 9.692  | 3.231 |
| Veh, IST-t120                                | 88.800  | 17.866 | 7.990  |               | Veh, IST-t120 | 84.667  | 14.000 | 4.667 |
| RA, IST-t0                                   | 94.143  | 7.244  | 2.738  |               | RA, IST-t0    | 105.250 | 17.705 | 5.111 |
| RA, IST-t15                                  | 68.286  | 12.379 | 4.679  |               | RA, IST-t15   | 85.250  | 16.581 | 4.787 |
| RA, IST-t30                                  | 55.714  | 7.544  | 2.851  |               | RA, IST-t30   | 55.167  | 14.819 | 4.278 |
| RA, IST-t60                                  | 51.571  | 9.554  | 3.611  |               | RA, IST-t60   | 70.417  | 14.607 | 4.217 |
| RA, IST-t120                                 | 64.857  | 13.409 | 5.068  |               | RA, IST-t120  | 90.167  | 13.204 | 3.812 |
|                                              |         |        |        |               |               |         |        |       |
| Old females                                  |         |        |        | Young females |               |         |        |       |
| Mean                                         | SD      | SE     | Mean   | SD            | SE            |         |        |       |
| Veh, IST-t0                                  | 126.000 | 11.679 | 4.768  | Veh, IST-t0   | 98.111        | 8.781   | 2.927  |       |
| Veh, IST-t15                                 | 87.000  | 16.971 | 6.928  | Veh, IST-t15  | 73.222        | 17.761  | 5.920  |       |
| Veh, IST-t30                                 | 75.000  | 18.067 | 7.376  | Veh, IST-t30  | 47.889        | 9.892   | 3.297  |       |
| Veh, IST-t60                                 | 63.167  | 16.582 | 6.770  | Veh, IST-t60  | 55.111        | 13.824  | 4.608  |       |
| Veh, IST-t120                                | 102.667 | 18.811 | 7.680  | Veh, IST-t120 | 76.111        | 13.615  | 4.538  |       |
| RA, IST-t0                                   | 112.571 | 9.090  | 3.436  | RA, IST-t0    | 98.250        | 11.005  | 3.177  |       |
| RA, IST-t15                                  | 78.857  | 12.941 | 4.891  | RA, IST-t15   | 71.750        | 8.346   | 2.409  |       |
| RA, IST-t30                                  | 69.857  | 15.910 | 6.014  | RA, IST-t30   | 40.083        | 9.520   | 2.748  |       |
| RA, IST-t60                                  | 68.429  | 31.149 | 11.773 | RA, IST-t60   | 46.167        | 14.012  | 4.045  |       |
| RA, IST-t120                                 | 89.714  | 19.024 | 7.190  | RA, IST-t120  | 83.583        | 8.512   | 2.457  |       |

#### Serum parameters

Exclusion criteria: whether following the extraction procedure the amount of serum available was not sufficient to assay insulin, leptin and adiponectin levels, subjects were excluded from the statistical analysis. The final number of mice in the 24-month-old group was RA: males=6, females=7; Control: males=5, females=8; the final number of mice in the 3-month-old group was RA: males=12, females=10; Control: males=9, females=10 for insulin.

| INSULIN (pg/mL) |         |        |        |  |               |         |         |        |
|-----------------|---------|--------|--------|--|---------------|---------|---------|--------|
| Old males       | Mean    | SD     | SE     |  | Young males   | Mean    | SD      | SE     |
| Veh             | 100.000 | 44.020 | 19.686 |  | Veh           | 100.000 | 73.825  | 24.608 |
| RA              | 114.694 | 52.317 | 21.358 |  | RA            | 93.770  | 37.579  | 10.848 |
|                 |         |        |        |  |               |         |         |        |
| Old females     | Mean    | SD     | SE     |  | Young females | Mean    | SD      | SE     |
| Veh             | 100.000 | 42.011 | 14.853 |  | Veh           | 100.000 | 77.512  | 24.511 |
| RA              | 124.687 | 89.324 | 31.581 |  | RA            | 154.830 | 137.899 | 43.608 |

The final number of mice in the 24-month-old group was RA: males=7, females=7; Control: males=5, females=8; the final number of mice in the 3-month-old group was RA: males=12, females=13; Control: males=9, females=10 for leptin.

| LEPTIN (pg/mL) |         |        |        |  |               |         |         |        |
|----------------|---------|--------|--------|--|---------------|---------|---------|--------|
| Old males      | Mean    | SD     | SE     |  | Young males   | Mean    | SD      | SE     |
| Veh            | 100.000 | 50.890 | 22.759 |  | Veh           | 100.000 | 82.070  | 27.357 |
| RA             | 91.646  | 44.918 | 16.978 |  | RA            | 220.017 | 126.801 | 36.604 |
|                |         |        |        |  |               |         |         |        |
| Old females    | Mean    | SD     | SE     |  | Young females | Mean    | SD      | SE     |
| Veh            | 100.000 | 32.832 | 12.409 |  | Veh           | 100.000 | 35.070  | 11.090 |
| RA             | 76.791  | 53.405 | 18.882 |  | RA            | 73.440  | 18.672  | 5.179  |

The final number of mice in the 24-month-old group was RA: males=6, females=8; Control: males=5, females=7; the final number of mice in the 3-month-old group was RA: males=11, females=13; Control: males=7, females=10 for adiponectin.

| ADIPONECTIN (pg/mL) |         |        |        |  |               |         |        |        |
|---------------------|---------|--------|--------|--|---------------|---------|--------|--------|
| Old males           | Mean    | SD     | SE     |  | Young males   | Mean    | SD     | SE     |
| Veh                 | 100.000 | 22.163 | 9.912  |  | Veh           | 100.000 | 36.673 | 13.861 |
| RA                  | 83.596  | 33.249 | 13.574 |  | RA            | 125.211 | 42.897 | 12.934 |
|                     |         |        |        |  |               |         |        |        |
| Old females         | Mean    | SD     | SE     |  | Young females | Mean    | SD     | SE     |
| Veh                 | 100.000 | 35.926 | 12.702 |  | Veh           | 100.000 | 28.377 | 8.974  |
| RA                  | 84.270  | 31.958 | 11.299 |  | RA            | 106.159 | 13.583 | 3.767  |

#### Plasma parameters

Exclusion criteria: whether following the extraction procedure the amount of plasma available was not sufficient to assay glucose, fructosamine, total CHOL, HDL, LDL, FFA and TAG levels, subjects were excluded from the statistical analysis. The final number of mice in the 24-month-old group was RA: males=7, females=7; Control: males=5, females=8; the final number of mice in the 3-month-old group was RA: males=10, females=13; Control: males=9, females=8 for glucose.

| GLUCOSE (mMol/L) |         |        |       |  |               |         |        |       |
|------------------|---------|--------|-------|--|---------------|---------|--------|-------|
| Old males        | Mean    | SD     | SE    |  | Young males   | Mean    | SD     | SE    |
| Veh              | 100.000 | 14.161 | 6.333 |  | Veh           | 100.000 | 27.675 | 9.225 |
| RA               | 103.836 | 16.111 | 6.089 |  | RA            | 107.297 | 15.902 | 5.029 |
|                  |         |        |       |  |               |         |        |       |
| Old females      | Mean    | SD     | SE    |  | Young females | Mean    | SD     | SE    |
| Veh              | 100.000 | 20.264 | 7.164 |  | Veh           | 100.000 | 18.869 | 6.671 |
| RA               | 96.543  | 16.744 | 6.328 |  | RA            | 79.124  | 14.358 | 3.982 |

The final number of mice in the 24-month-old group was RA: males=6, females=7; Control: males=5, females=8; the final number of mice in the 3-month-old group was RA: males=10, females=13; Control: males=9, females=8 for fructosamine.

| FRUCTOSAMINE (mMol/L) |         |        |        |  |               |         |        |       |
|-----------------------|---------|--------|--------|--|---------------|---------|--------|-------|
| Old males             | Mean    | SD     | SE     |  | Young males   | Mean    | SD     | SE    |
| Veh                   | 100.000 | 25.016 | 11.188 |  | Veh           | 100.000 | 21.291 | 7.097 |
| RA                    | 99.760  | 9.216  | 3.763  |  | RA            | 118.070 | 8.120  | 2.568 |
|                       |         |        |        |  |               |         |        |       |
| Old females           | Mean    | SD     | SE     |  | Young females | Mean    | SD     | SE    |
| Veh                   | 100.000 | 24.384 | 8.621  |  | Veh           | 100.000 | 10.105 | 3.573 |
| RA                    | 97.605  | 30.960 | 10.946 |  | RA            | 93.188  | 16.581 | 4.599 |



The final number of mice in the 24-month-old group was RA: males=7, females=7; Control: males=5, females=8; the final number of mice in the 3-month-old group was RA: males=10, females=13; Control: males=8, females=8 for total CHOL.

| TOTAL CHOLESTEROL (mMol/L) |         |        |       |  |               |         |        |       |
|----------------------------|---------|--------|-------|--|---------------|---------|--------|-------|
| Old males                  | Mean    | SD     | SE    |  | Young males   | Mean    | SD     | SE    |
| Veh                        | 100.000 | 14.106 | 6.309 |  | Veh           | 100.000 | 12.677 | 4.482 |
| RA                         | 93.690  | 25.730 | 9.725 |  | RA            | 93.023  | 17.058 | 5.394 |
|                            |         |        |       |  |               |         |        |       |
| Old females                | Mean    | SD     | SE    |  | Young females | Mean    | SD     | SE    |
| Veh                        | 100.000 | 22.749 | 8.043 |  | Veh           | 100.000 | 19.075 | 6.744 |
| RA                         | 97.934  | 17.120 | 6.053 |  | RA            | 84.939  | 19.739 | 5.475 |

The final number of mice in the 24-month-old group was RA: males=7, females=7; Control: males=5, females=8; the final number of mice in the 3-month-old group was RA: males=10, females=13; Control: males=8, females=8 for HDL.

| HDL (mMol/L) |         |        |        |  |               |         |        |       |
|--------------|---------|--------|--------|--|---------------|---------|--------|-------|
| Old males    | Mean    | SD     | SE     |  | Young males   | Mean    | SD     | SE    |
| Veh          | 100.000 | 12.931 | 5.783  |  | Veh           | 100.000 | 15.511 | 5.484 |
| RA           | 89.599  | 31.381 | 11.861 |  | RA            | 100.316 | 19.353 | 6.120 |
|              |         |        |        |  |               |         |        |       |
| Old females  | Mean    | SD     | SE     |  | Young females | Mean    | SD     | SE    |
| Veh          | 100.000 | 35.321 | 12.488 |  | Veh           | 100.000 | 16.220 | 5.735 |
| RA           | 99.846  | 19.119 | 6.760  |  | RA            | 81.053  | 18.202 | 5.048 |

The final number of mice in the 24-month-old group was RA: males=7, females=6; Control: males=5, females=7; the final number of mice in the 3-month-old group was RA: males=10, females=13; Control: males=9, females=8 for LDL.

| LDL (mMol/L) |         |        |        |  |               |         |        |       |
|--------------|---------|--------|--------|--|---------------|---------|--------|-------|
| Old males    | Mean    | SD     | SE     |  | Young males   | Mean    | SD     | SE    |
| Veh          | 100.000 | 38.054 | 17.018 |  | Veh           | 100.000 | 23.730 | 7.910 |
| RA           | 80.643  | 38.087 | 14.395 |  | RA            | 94.977  | 12.096 | 3.825 |
|              |         |        |        |  |               |         |        |       |
| Old females  | Mean    | SD     | SE     |  | Young females | Mean    | SD     | SE    |
| Veh          | 100.000 | 33.706 | 12.740 |  | Veh           | 100.000 | 9.653  | 3.413 |
| RA           | 83.712  | 57.457 | 23.457 |  | RA            | 109.865 | 5.949  | 1.650 |

The final number of mice in the 24-month-old group was RA: males=7, females=7; Control: males=5, females=8; the final number of mice in the 3-month-old group was RA: males=10, females=12; Control: males=9, females=8 for FFA.

| FFA (mMol/L) |         |        |        |  |               |         |        |        |
|--------------|---------|--------|--------|--|---------------|---------|--------|--------|
| Old males    | Mean    | SD     | SE     |  | Young males   | Mean    | SD     | SE     |
| Veh          | 100.000 | 37.025 | 16.558 |  | Veh           | 100.000 | 44.890 | 14.963 |
| RA           | 107.366 | 53.883 | 20.366 |  | RA            | 164.490 | 48.968 | 15.485 |
|              |         |        |        |  |               |         |        |        |
| Old females  | Mean    | SD     | SE     |  | Young females | Mean    | SD     | SE     |
| Veh          | 100.000 | 35.930 | 12.703 |  | Veh           | 100.000 | 37.833 | 13.376 |
| RA           | 150.287 | 73.089 | 25.841 |  | RA            | 51.524  | 18.944 | 5.469  |

The final number of mice in the 24-month-old group was RA: males=7, females=7; Control: males=5, females=8; the final number of mice in the 3-month-old group was RA: males=10, females=12; Control: males=9, females=8 for TAG.

| TRIGLYCERIDES (mMol/L) |         |        |        |  |               |         |        |        |
|------------------------|---------|--------|--------|--|---------------|---------|--------|--------|
| Old males              | Mean    | SD     | SE     |  | Young males   | Mean    | SD     | SE     |
| Veh                    | 100.000 | 5.336  | 2.386  |  | Veh           | 100.000 | 45.779 | 15.260 |
| RA                     | 117.460 | 29.554 | 11.170 |  | RA            | 80.091  | 29.426 | 9.305  |
|                        |         |        |        |  |               |         |        |        |
| Old females            | Mean    | SD     | SE     |  | Young females | Mean    | SD     | SE     |
| Veh                    | 100.000 | 24.236 | 8.569  |  | Veh           | 100.000 | 23.224 | 8.211  |
| RA                     | 124.351 | 22.868 | 8.643  |  | RA            | 67.659  | 9.494  | 2.741  |

## Supplementary figures

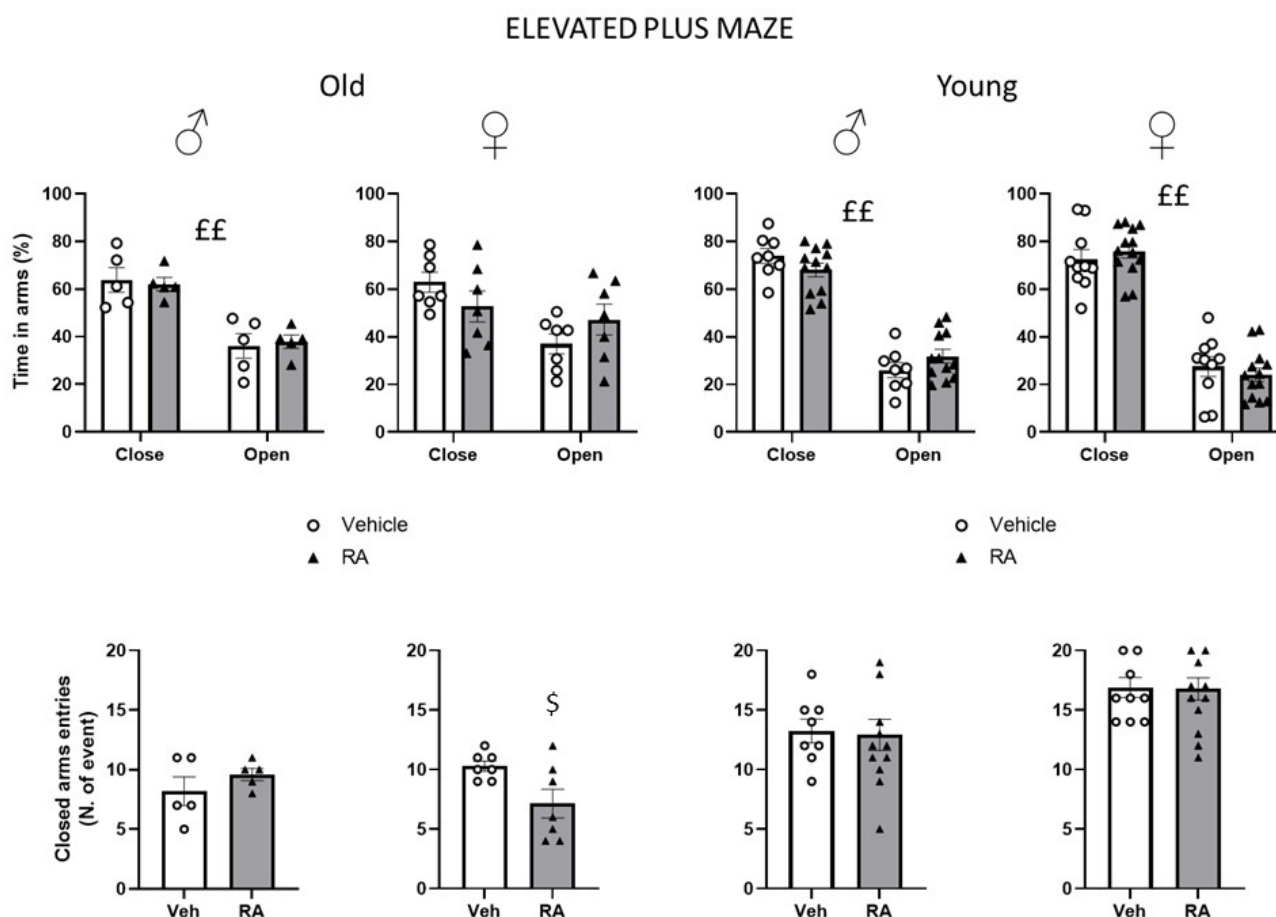

**Figure S2.** Elevated Plus Maze - Old males showed a preference for the closed arms of the maze while this was not observed in same age females. Only old RA-females showed a reduced frequency to visit the closed arms suggesting reduced anxiety. Both male and female young mice showed a strong preference for the closed arms and no difference was observed in closed arms entries. Data are expressed as mean  $\pm$  SEM. White dots and black triangles represents individual observations for Veh and RA mice, respectively. ££  $p < 0.01$  main effect of repeated measures (zone: Close vs. Open); \$  $p < 0.05$  main effect of treatment; old: N=5-8/group; young: N=9-13/group.

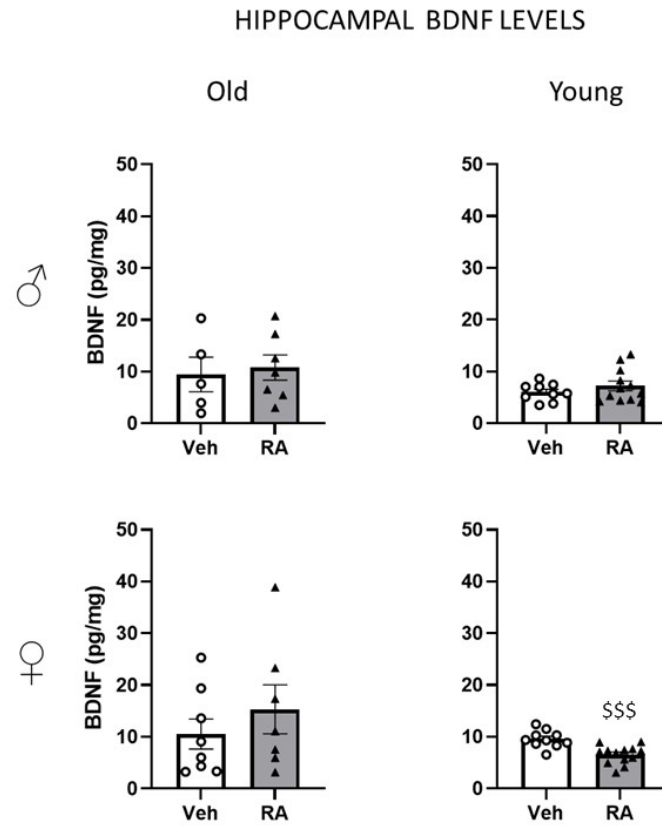

**Figure S3.** Hippocampal BDNF levels - RA significantly reduced hippocampal BDNF levels in young females. No difference was observed in young males as well as in old mice. Data are expressed as mean  $\pm$  SEM. White dots and black triangles represents individual observations for Veh and RA mice, respectively. \$\$\$  $p < 0.001$  main effect of treatment; old: N=5-8/group; young: N=9-13/group.

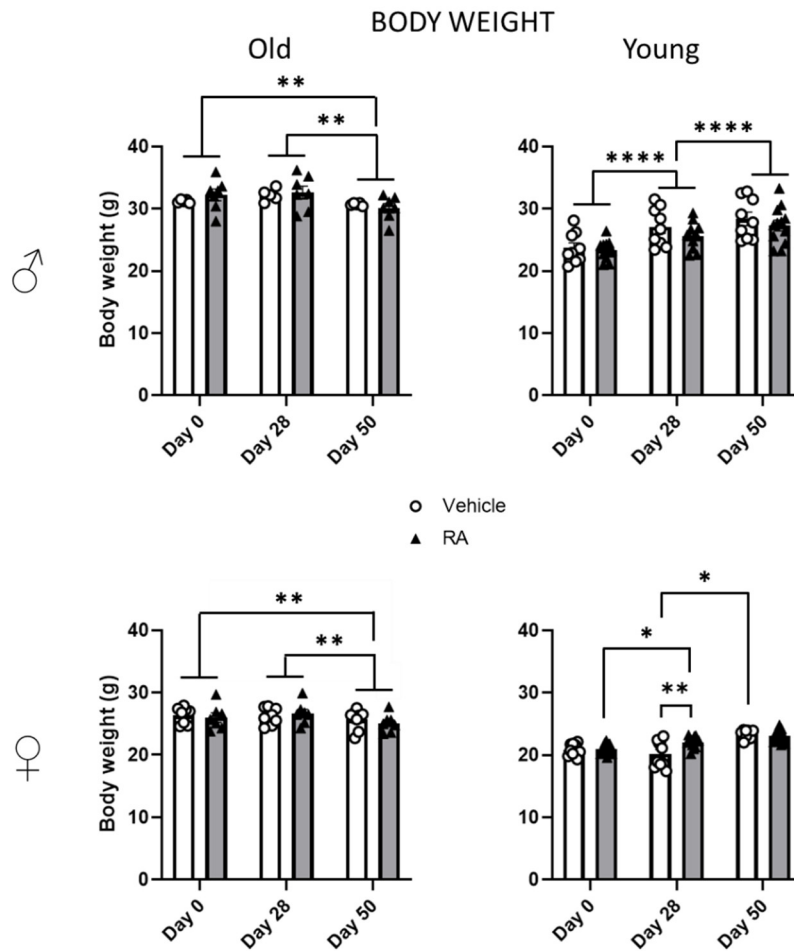

**Figure S4.** Body weight - Old subjects were overall characterised by a decrease in body weight at day 50. By contrast, young mice were characterised by an increase in body weight overtime regardless of treatment. As for females while RA-treated subjects showed an increase in body weight at day 28 in control females this increase was apparent at day 50. Data are expressed as mean  $\pm$  SEM. White dots and black triangles represents individual observations for Veh and RA mice, respectively. Stars are used to indicate Tukey's post hoc comparisons: \*  $p < 0.05$ , RA-day28 vs RA-day0 and Veh-day50 vs Veh-day28; \*\*  $p < 0.01$ , day50 vs day28 and day0 and RA-day28 vs Veh-day28, \*\*\*  $p < 0.0001$ , day28 vs day0 and day50 vs day28; old: N=5-8/group; young: N=9-13/group.

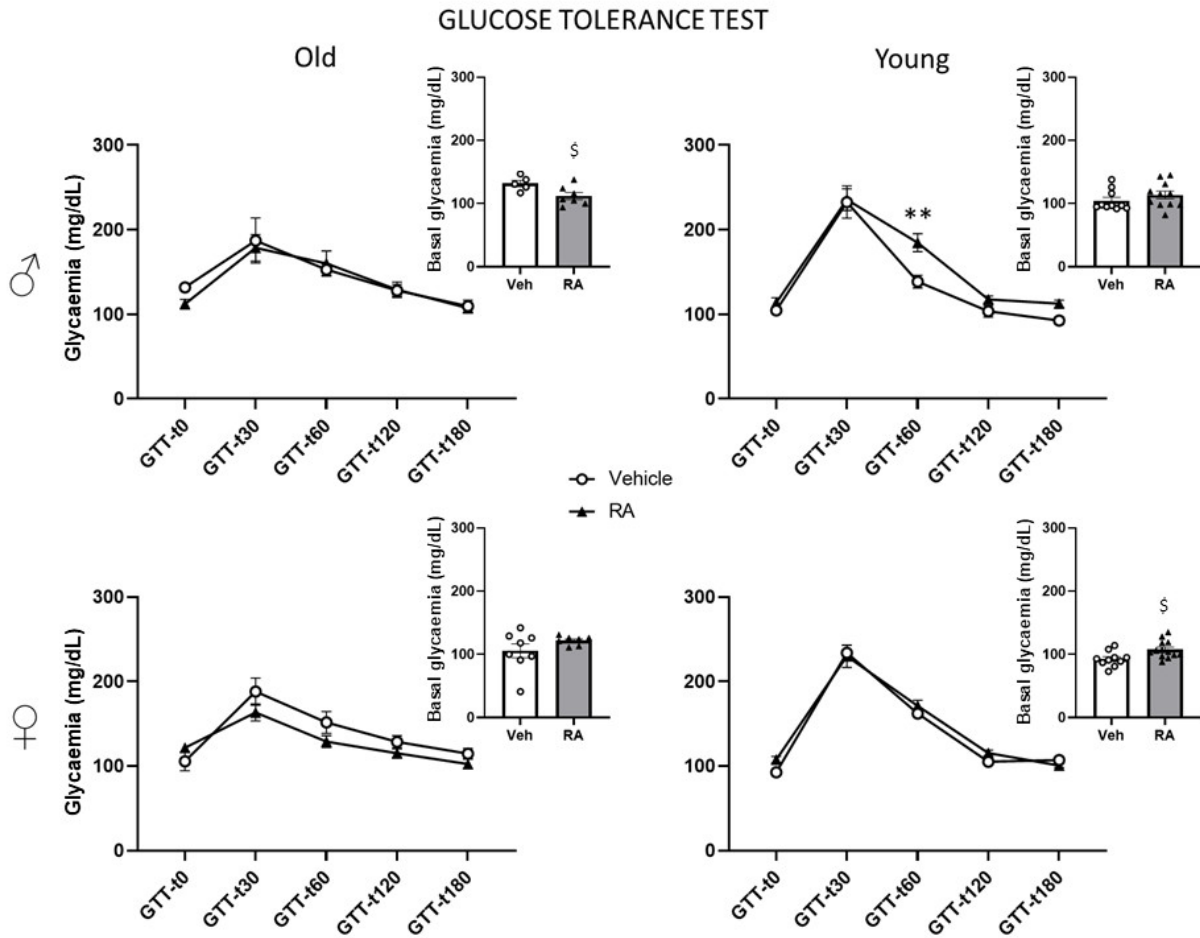

**Figure S5.** Glucose Tolerance Test - RA decreased the levels of basal glycaemia in old males and an overall slight trend in old RA females was also observed. By contrast, in young mice, RA increased glycaemia levels at T60 in males and at T0 in females. Data are expressed as mean  $\pm$  SEM. White dots and black triangles represents individual observations for Veh and RA mice, respectively. \$  $p < 0.05$  main effect of treatment; \*\*  $p < 0.01$  Tukey's test RA-T60 vs Veh-T60; old: N=5-8/group; young: N=9-13/group.

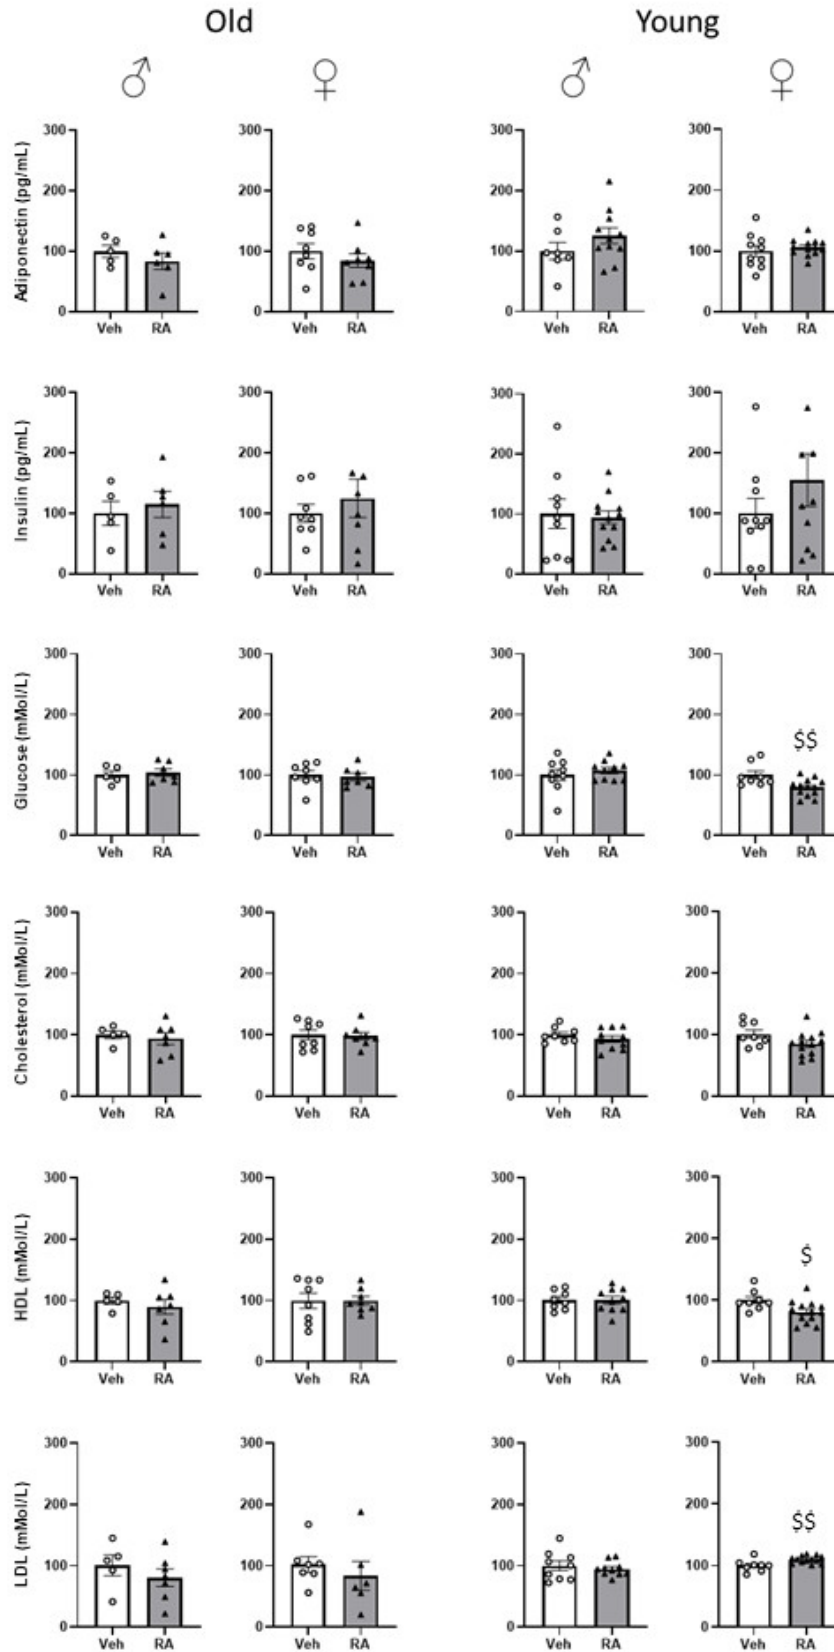

**Figure S6.** Serum and plasmatic parameters - No difference due to RA was observed in adiponectin and insulin serum levels in both old and young subjects. Moreover, RA treatment did not affect the lipid and glucose profile in old mice and young males while it decreased plasmatic glucose and HDL levels and increased LDL levels in young females. Data are expressed as mean  $\pm$  SEM. White dots and black triangles represents individual observations for Veh and RA mice, respectively. \$  $p < 0.05$ , \$\$  $p < 0.01$  main effect of treatment; old: N=5-8/group; young: N=9-13/group.
